# Supplementary material for: Preparation of Ag Doped Keratin/PA6 Nanofiber Membrane with Enhanced Air Filtration and Antimicrobial Properties
Source: PubMed Central journal article supplement (PMC6780504; doi:10.3390/polym11091511), 2019-09-16
Supplement: polymers-11-01511-s001.pdf [file polymers-11-01511-s001.pdf]

# Preparation of Ag Doped Keratin/PA6 Nanofiber Membrane with Enhanced Air Filtration and Antimicrobial Properties

Baolei Shen <sup>1</sup>, Dongyu Zhang <sup>2</sup>, Yujuan Wei <sup>1</sup>, Zihua Zhao <sup>3</sup>, Xiaofei Ma <sup>1</sup>, Xiaodan Zhao <sup>3</sup>, Shuo Wang <sup>1,\*</sup> and Wenxiu Yang <sup>1,\*</sup>

<sup>1</sup> College of Textile and Garments, Hebei University of Science and Technology, Shijiazhuang, 050018, China; shenbaolie@163.com. (B.S.); weiyujuan66@sina.com. (Y.W.); mxiaof1007@163.com. (X.M.)

<sup>2</sup> School of Environmental Science and Engineering, Hebei University of Science and Technology, Shijiazhuang, 050018, China; dongyuz01@163.com

<sup>3</sup> College of Bioscience and Bioengineering, Hebei University of Science and Technology, Shijiazhuang, 050018, China; zzh1398921@163.com. (Z.Z.); zxd199404@163.com. (X.Z.)

\* Correspondence: fzwangshuo@hebust.edu.cn (S.W.); wenxiuyang-hbust@outlook.com (W.Y.); Tel.: +86-311-81668835 (S.W.); +86-311-81668836 (W.Y.)

## Comparison of coarse wool and commercial wool

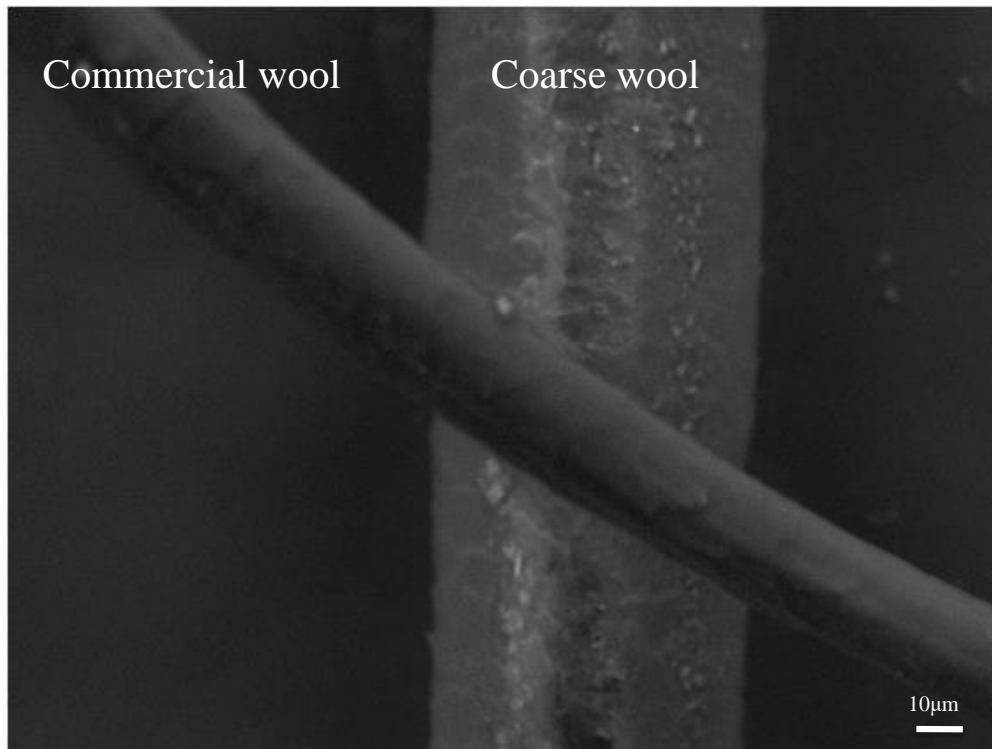

Figure S1. SEM images of coarse wool and commercial wool

## SDS-PAGE

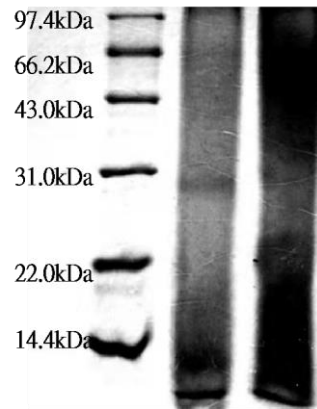

**Figure S2.** Schematic diagram of SDS-PAGE gel electrophoresis. The left is the low weight standard protein (marker), the middle is the method of  $\text{Na}_2\text{S}_2\text{O}_3$  keratin electrophoresis image and the right is the method of  $\text{NaHSO}_3$  keratin electrophoresis image.

### Pore size distribution of the composite membrane

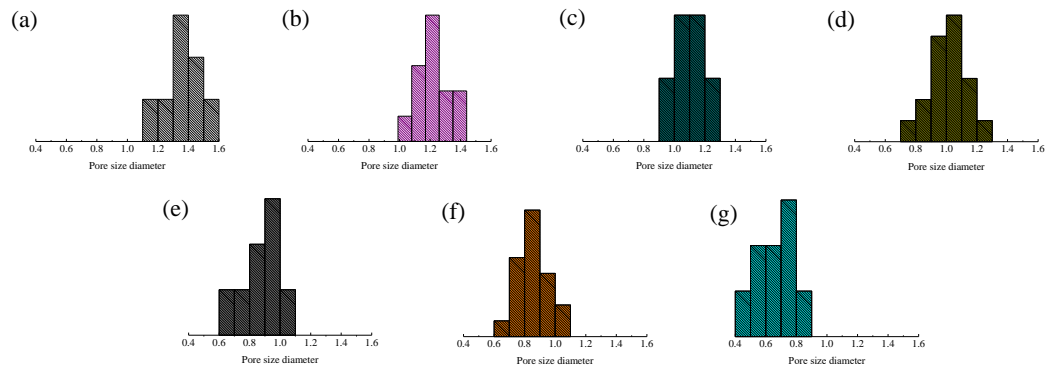

**Figure S3.** Schematic diagram of pore size distribution of composite membrane, The a, b, c, d, e f and g column images of Ker.0%/PA6, Ker.30%/PA6, Ker.30%/PA6 Ag.1%-Ker.30%/PA6, Ag.10%-Ker.30%/PA6, Ker.50%/PA6 and Ker.70%/PA6, respectively.

### Filter efficiency and pressure drop

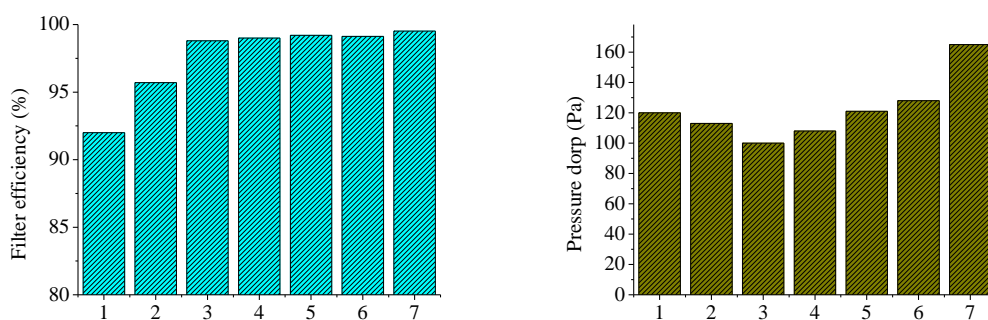

**Figure S4.** Schematic diagram of filter efficiency and pressure drop. The 1, 2, 3, 4, 5, 6 and 7 column images of Ker.0%/PA, Ker.30%/PA6', Ker.30%/PA6, Ag.1%-Ker.30%/PA6, Ag.10%-Ker.30%/PA6, Ker.50%/PA6 and Ker.70%/PA6, respectively.

**Table S1.** Pore size diameter, WVT, and QF of nano-structure mats.

| Samples            | Pore size diameter ( $\mu\text{m}$ ) | WVT (g/m <sup>2</sup> ) | QF    |
|--------------------|--------------------------------------|-------------------------|-------|
| Pure PA6           | 1.398 $\pm$ 0.2                      | 151.2                   | 0.021 |
| Ker.30%/PA6'       | 1.240 $\pm$ 0.3                      | 155.6                   | 0.028 |
| Ker.30%/PA6        | 1.113 $\pm$ 0.2                      | 166.2                   | 0.044 |
| Ag.1%-ker.30%/PA6  | 1.005 $\pm$ 0.2                      | 163.3                   | 0.042 |
| Ag.10%-ker.30%/PA6 | 0.8784 $\pm$ 0.2                     | 157.8                   | 0.04  |
| Ker.50%/PA6        | 0.8487 $\pm$ 0.2                     | 154.4                   | 0.037 |
| Ker.70%/PA6        | 0.6330 $\pm$ 0.2                     | 146.2                   | 0.032 |

## Thermal stability

**Table S2.** Mass of residues, peak degradation temperatures and melting temperatures of the different nanofibers mats.

| Samples            | Mass of residues (%) | Peak degradation temperatures ( $^{\circ}\text{C}$ ) |
|--------------------|----------------------|------------------------------------------------------|
| Pure PA6           | 0.92                 | 434                                                  |
| Ker.30%/PA6'       | 2.04                 | 436                                                  |
| Ker.30%/PA6        | 2.29                 | 432                                                  |
| Ag.1%-ker.30%/PA6  | 22.6                 | 417                                                  |
| Ag.10%-ker.30%/PA6 | 30.1                 | 411                                                  |
| Ker.50%/PA6        | 8.21                 | 426                                                  |
| Ker.70%/PA6        | 13.27                | 408                                                  |

**Table S3.** The peak melting temperature of the composite membrane.

| Samples            | Peak melting temperature (°C) |     |
|--------------------|-------------------------------|-----|
| Pure PA6           | 207                           | 218 |
| Ker.30%/PA6'       | 214                           | 225 |
| Ker.30%/PA6        | 219                           | 230 |
| Ag.1%-ker.30%/PA6  | 215                           | 230 |
| Ag.10%-ker.30%/PA6 |                               | 196 |
| Ker.50%/PA6        | 212                           | 229 |
| Ker.70%/PA6        |                               | 209 |
